# Supplementary material
Source: ML conference proceedings conference paper supplement (https://proceedings.mlr.press/v97/wang19o.html)
Supplement: Supplementary file [file wang19o-supp.pdf]

## A. Proof of Lemma 3

**Lemma.** For Reparameterizable RL, given assumptions 1, 2, and 3, the empirical reward  $R$  defined in (10), as a function of the parameter  $\theta$ , has a Lipschitz constant of

$$\beta = \sum_{t=0}^T \gamma^t L_r L_{t_2} L_{\pi_2} \frac{\nu^t - 1}{\nu - 1}$$

where  $\nu = L_{t_1} + L_{t_2} L_{\pi_1}$ .

*Proof.* Let's denote  $s'_t = s_t(\theta')$ , and  $s_t = s_t(\theta)$ . We start by investigating the policy function across different time steps:

$$\begin{aligned} & \|\pi(s'_t; \theta') - \pi(s_t; \theta)\| \\ &= \|\pi(s'_t; \theta') - \pi(s_t; \theta') + \pi(s_t; \theta') - \pi(s_t; \theta)\| \\ &\leq \|\pi(s'_t; \theta') - \pi(s_t; \theta')\| + \|\pi(s_t; \theta') - \pi(s_t; \theta)\| \\ &\leq L_{\pi_1} \|s'_t - s_t\| + L_{\pi_2} \|\theta' - \theta\| \end{aligned} \quad (17)$$

The first inequality is the triangle inequality, and the second is from our Lipschitz assumption 2.

If we look at the change of states as the episode proceeds:

$$\begin{aligned} & \|s'_t - s_t\| \\ &= \|\mathcal{T}(s'_{t-1}, \pi(s'_{t-1}; \theta'), \xi_{t-1}) - \mathcal{T}(s_{t-1}, \pi(s_{t-1}; \theta), \xi_{t-1})\| \\ &\leq \|\mathcal{T}(s'_{t-1}, \pi(s'_{t-1}; \theta'), \xi_{t-1}) - \mathcal{T}(s_{t-1}, \pi(s'_{t-1}; \theta'), \xi_{t-1})\| \\ &\quad + \|\mathcal{T}(s_{t-1}, \pi(s'_{t-1}; \theta'), \xi_{t-1}) - \mathcal{T}(s_{t-1}, \pi(s_{t-1}; \theta), \xi_{t-1})\| \\ &\leq L_{t_1} \|s'_{t-1} - s_{t-1}\| + L_{t_2} \|\pi(s'_{t-1}; \theta') - \pi(s_{t-1}; \theta)\| \end{aligned} \quad (18)$$

Now combine both (17) and (18),

$$\begin{aligned} & \|s'_t - s_t\| \\ &\leq L_{t_1} \|s'_{t-1} - s_{t-1}\| \\ &\quad + L_{t_2} (L_{\pi_1} \|s'_{t-1} - s_{t-1}\| + L_{\pi_2} \|\theta' - \theta\|) \\ &\leq (L_{t_1} + L_{t_2} L_{\pi_1}) \|s'_{t-1} - s_{t-1}\| + L_{t_2} L_{\pi_2} \|\theta' - \theta\| \end{aligned}$$

In the initialization, we know  $s'_0 = s_0$  since the initialization process does not involve any computation using the parameter  $\theta$  in the policy  $\pi$ .

By recursion, we get

$$\begin{aligned} \|s'_t - s_t\| &\leq L_{t_2} L_{\pi_2} \|\theta' - \theta\| \sum_{i=0}^{t-1} (L_{t_1} + L_{t_2} L_{\pi_1})^i \\ &= L_{t_2} L_{\pi_2} \frac{\nu^t - 1}{\nu - 1} \|\theta' - \theta\| \end{aligned}$$

where  $\nu = L_{t_1} + L_{t_2} L_{\pi_1}$ .

By assumption 3,  $r(s)$  is  $L_r$ -Lipschitz, so

$$\begin{aligned} \|r(s'_t) - r(s_t)\| &\leq L_r \|s'_t - s_t\| \\ &\leq L_r L_{t_2} L_{\pi_2} \frac{\nu^t - 1}{\nu - 1} \|\theta' - \theta\| \end{aligned}$$

So the reward

$$\begin{aligned} |R(s') - R(s)| &= \left| \sum_{t=0}^T \gamma^t r(s'_t) - \sum_{t=0}^T \gamma^t r(s_t) \right| \\ &\leq \left| \sum_{t=0}^T \gamma^t (r(s'_t) - r(s_t)) \right| \leq \sum_{t=0}^T \gamma^t |r(s'_t) - r(s_t)| \\ &\leq \sum_{t=0}^T \gamma^t L_r L_{t_2} L_{\pi_2} \frac{\nu^t - 1}{\nu - 1} \|\theta' - \theta\| = \beta \|\theta' - \theta\| \end{aligned}$$

□

## B. Proof of Lemma 6

**Lemma.** In reparameterizable RL, suppose the initialization function  $\mathcal{I}'$  in the test environment satisfies  $\|(\mathcal{I}' - \mathcal{I})(\xi)\| \leq \delta$ , and the transition function is the same for both training and testing environment. If assumptions (1), (2), and (3) hold then

$$\begin{aligned} & |\mathbb{E}_\xi[R(s(\xi; \mathcal{I}'))] - \mathbb{E}_\xi[R(s(\xi; \mathcal{I}))]| \leq \\ & \sum_{t=0}^T \gamma^t L_r (L_{t_1} + L_{t_2} L_{\pi_1})^t \delta \end{aligned}$$

*Proof.* Denote the states at time  $t$  with  $\mathcal{I}'$  as the initialization function as  $s'_t$ . Again we look at the difference between  $s'_t$  and  $s_t$ . By triangle inequality and assumptions 1 and 2,

$$\begin{aligned} & \|s'_t - s_t\| \\ &= \|\mathcal{T}(s'_{t-1}, \pi(s'_{t-1}), \xi_{t-1}) - \mathcal{T}(s_{t-1}, \pi(s_{t-1}), \xi_{t-1})\| \\ &\leq \|\mathcal{T}(s'_{t-1}, \pi(s'_{t-1}), \xi_{t-1}) - \mathcal{T}(s_{t-1}, \pi(s'_{t-1}), \xi_{t-1})\| \\ &\quad + \|\mathcal{T}(s_{t-1}, \pi(s'_{t-1}), \xi_{t-1}) - \mathcal{T}(s_{t-1}, \pi(s_{t-1}), \xi_{t-1})\| \\ &\leq L_{t_1} \|s'_{t-1} - s_{t-1}\| + L_{t_2} \|\pi(s'_{t-1}) - \pi(s_{t-1})\| \\ &\leq L_{t_1} \|s'_{t-1} - s_{t-1}\| + L_{t_2} L_{\pi_1} \|s'_{t-1} - s_{t-1}\| \\ &= (L_{t_1} + L_{t_2} L_{\pi_1}) \|s'_{t-1} - s_{t-1}\| \\ &\leq (L_{t_1} + L_{t_2} L_{\pi_1})^t \|s'_0 - s_0\| \\ &\leq (L_{t_1} + L_{t_2} L_{\pi_1})^t \delta \end{aligned}$$

where the last inequality is due to the assumption that

$$\|s'_0 - s_0\| = \|\mathcal{I}'(\xi) - \mathcal{I}(\xi)\| \leq \delta$$

Also since  $r(s)$  is also Lipschitz,

$$\begin{aligned} |R(s') - R(s)| &= \left| \sum_{t=0}^T \gamma^t r(s'_t) - \sum_{t=0}^T \gamma^t r(s_t) \right| \\ &\leq \sum_{t=0}^T \gamma^t |r(s'_t) - r(s_t)| \leq \sum_{t=0}^T \gamma^t L_r \|s'_t - s_t\| \\ &\leq L_r \delta \sum_{t=0}^T \gamma^t (L_{t1} + L_{t2} L_{\pi 1})^t \end{aligned}$$

The argument above holds for any given random input  $\xi$ , so

$$\begin{aligned} &|\mathbb{E}_\xi[R(s'(\xi))] - \mathbb{E}_\xi[R(s(\xi))]| \\ &\leq \left| \int_{\xi} (R(s'(\xi)) - R(s(\xi))) \right| \\ &\leq \int_{\xi} |R(s'(\xi)) - R(s(\xi))| \\ &\leq L_r \delta \sum_{t=0}^T \gamma^t (L_{t1} + L_{t2} L_{\pi 1})^t \end{aligned}$$

□

### C. Proof of Lemma 7

**Lemma.** *In reparameterizable RL, suppose the transition  $\mathcal{T}'$  in the test environment satisfies  $\forall x, y, z, \|(\mathcal{T}' - \mathcal{T})(x, y, z)\| \leq \delta$ , and the initialization is the same for both the training and testing environment. If assumptions (1), (2) and (3) hold then*

$$|\mathbb{E}_\xi[R(s(\xi; \mathcal{T}'))] - \mathbb{E}_\xi[R(s(\xi; \mathcal{T}))]| \leq \sum_{t=0}^T \gamma^t L_r \frac{1 - \nu^t}{1 - \nu} \delta \quad (19)$$

where  $\nu = L_{t1} + L_{t2} L_{\pi 1}$

*Proof.* Again let's denote the state at time  $t$  with the new transition function  $\mathcal{T}'$  as  $s'_t$ , and the state at time  $t$  with the original transition function  $\mathcal{T}$  as  $s_t$ , then

$$\begin{aligned} &\|s'_t - s_t\| \\ &= \|\mathcal{T}'(s'_{t-1}, \pi(s'_{t-1}), \xi_{t-1}) - \mathcal{T}(s_{t-1}, \pi(s_{t-1}), \xi_{t-1})\| \\ &\leq \|\mathcal{T}'(s'_{t-1}, \pi(s'_{t-1}), \xi_{t-1}) - \mathcal{T}'(s_{t-1}, \pi(s_{t-1}), \xi_{t-1})\| + \\ &\|\mathcal{T}'(s_{t-1}, \pi(s_{t-1}), \xi_{t-1}) - \mathcal{T}(s_{t-1}, \pi(s_{t-1}), \xi_{t-1})\| \\ &\leq \|\mathcal{T}'(s'_{t-1}, \pi(s'_{t-1}), \xi_{t-1}) - \mathcal{T}'(s_{t-1}, \pi(s'_{t-1}), \xi_{t-1})\| \\ &+ \|\mathcal{T}'(s_{t-1}, \pi(s'_{t-1}), \xi_{t-1}) - \mathcal{T}'(s_{t-1}, \pi(s_{t-1}), \xi_{t-1})\| + \delta \\ &\leq L_{t1} \|s'_{t-1} - s_{t-1}\| + L_{t2} \|\pi(s'_{t-1}) - \pi(s_{t-1})\| + \delta \\ &\leq L_{t1} \|s'_{t-1} - s_{t-1}\| + L_{t2} L_{\pi 1} \|s'_{t-1} - s_{t-1}\| + \delta \\ &= (L_{t1} + L_{t2} L_{\pi 1}) \|s'_{t-1} - s_{t-1}\| + \delta \end{aligned}$$

Again we have the initialization condition

$$s'_0 = s_0$$

since the initialization procedure  $\mathcal{I}$  stays the same. By recursion we have

$$\|s'_t - s_t\| \leq \delta \sum_{t=0}^{t-1} (L_{t1} + L_{t2} L_{\pi 1})^t \quad (20)$$

By assumption 3,

$$\begin{aligned} |R(s') - R(s)| &= \left| \sum_{t=0}^T \gamma^t r(s'_t) - \sum_{t=0}^T \gamma^t r(s_t) \right| \\ &\leq \sum_{t=0}^T \gamma^t |r(s'_t) - r(s_t)| \leq \sum_{t=0}^T \gamma^t L_r \|s'_t - s_t\| \\ &\leq L_r \delta \sum_{t=0}^T \gamma^t \left( \sum_{k=0}^{t-1} (L_{k1} + L_{k2} L_{\pi 1})^k \right) \\ &\leq L_r \delta \sum_{t=0}^T \gamma^t \frac{\nu^t - 1}{\nu - 1} \end{aligned}$$

where  $\nu = L_{t1} + L_{t2} L_{\pi 1}$ . Again the argument holds for any given random input  $\xi$ , so

$$\begin{aligned} &|\mathbb{E}_\xi[R(s'(\xi))] - \mathbb{E}_\xi[R(s(\xi))]| \\ &\leq \left| \int_{\xi} (R(s'(\xi)) - R(s(\xi))) \right| \\ &\leq \int_{\xi} |R(s'(\xi)) - R(s(\xi))| \\ &\leq L_r \delta \sum_{t=0}^T \gamma^t \frac{\nu^t - 1}{\nu - 1} \end{aligned}$$

□

### D. Proof of Theorem 1

**Theorem.** *In reparameterizable RL, suppose the transition  $\mathcal{T}'$  in the test environment satisfies  $\forall x, y, z, \|(\mathcal{T}' - \mathcal{T})(x, y, z)\| \leq \zeta$ , and suppose the initialization function  $\mathcal{I}'$  in the test environment satisfies  $\forall \xi, \|(\mathcal{I}' - \mathcal{I})(\xi)\| \leq \epsilon$ . If assumptions (1), (2) and (3) hold, the peripheral random variables  $\xi^i$  for each episode are i.i.d., and the reward is bounded  $|R(s)| \leq c/2$ , then with probability at least  $1 - \delta$ , for all policy  $\pi \in \Pi$ ,*

$$\begin{aligned} &|\mathbb{E}_\xi[R(s(\xi; \pi, \mathcal{T}', \mathcal{I}'))] - \frac{1}{n} \sum_i R(s(\xi^i; \pi, \mathcal{T}, \mathcal{I}))| \\ &\leq \text{Rad}(R_{\pi, \mathcal{T}, \mathcal{I}}) + L_r \zeta \sum_{t=0}^T \gamma^t \frac{\nu^t - 1}{\nu - 1} + L_r \epsilon \sum_{t=0}^T \gamma^t \nu^t \\ &+ O\left(c \sqrt{\frac{\log(1/\delta)}{n}}\right) \end{aligned}$$

where  $\nu = L_{t1} + L_{t2}L_{\pi1}$ , and

$$\text{Rad}(R_{\pi, \mathcal{T}, \mathcal{I}}) = \mathbb{E}_{\xi} \mathbb{E}_{\sigma} \left[ \sup_{\pi} \frac{1}{n} \sum_{i=1}^n \sigma_i R(s^i(\xi^i; \pi, \mathcal{T}, \mathcal{I})) \right]$$

is the Rademacher complexity of  $R(s(\xi; \pi, \mathcal{T}, \mathcal{I}))$  under the training transition  $\mathcal{T}$ , the training initialization  $\mathcal{I}$ , and  $n$  is the number of training episodes.

*Proof.* Note

$$\begin{aligned} & \left| \frac{1}{n} \sum_i R(s(\xi^i; \pi, \mathcal{T}, \mathcal{I})) - \mathbb{E}_{\xi} [R(s(\xi; \pi, \mathcal{T}', \mathcal{I}))] \right| \\ & \leq \left| \frac{1}{n} \sum_i R(s(\xi^i; \pi, \mathcal{T}, \mathcal{I})) - \mathbb{E}_{\xi} [R(s(\xi; \pi, \mathcal{T}, \mathcal{I}))] \right| \\ & \quad + \left| \mathbb{E}_{\xi} [R(s(\xi; \pi, \mathcal{T}, \mathcal{I}))] - \mathbb{E}_{\xi} [R(s(\xi; \pi, \mathcal{T}', \mathcal{I}))] \right| \\ & \quad + \left| \mathbb{E}_{\xi} [R(s(\xi; \pi, \mathcal{T}', \mathcal{I}))] - \mathbb{E}_{\xi} [R(s(\xi; \pi, \mathcal{T}', \mathcal{I}))] \right| \end{aligned}$$

Then theorem 1 is a direct consequence of Lemma 2, Lemma 6, and Lemma 7.  $\square$
